# Supplementary material for: Performance of Nomogram Prediction Combining MiRNAs in Cervical Mucus, HPV Genotype and Age for Cervical Cancer and its Precursor Lesions
Source: Research Square preprint supplement (doi:10.21203/rs.3.rs-1194933/v1), 2022-01-06
Supplement: Supplementary file 1 [file 114b060992d39fbc4d47ef35.docx]

| Table 2 Performance of nomograms for the risk of cervical neoplasia | | | | | |  |
| --- | --- | --- | --- | --- | --- | --- |
|  |  | Sensitivity | Specificity | Accuracy | PPV | NPV |
| Cancer | Nomogram 1 | 0.886 | 0.813 | 0.867 | 0.951 | 0.684 |
|  | Nomogram 2 | 0.977 | 1.000 | 0.983 | 1.000 | 0.941 |
|  | Nomogram 3 | 0.955 | 1.000 | 0.967 | 1.000 | 0.889 |
|  | Nomogram 4 | 0.955 | 1.000 | 0.967 | 1.000 | 0.889 |
|  |  |  |  |  |  |  |
| CIN3+ | Nomogram 11 | 0.889 | 0.813 | 0.875 | 0.955 | 0.619 |
|  | Nomogram 12 | 0.958 | 1.000 | 0.966 | 1.000 | 0.842 |
|  | Nomogram 13 | 0.931 | 1.000 | 0.943 | 1.000 | 0.762 |
|  | Nomogram 14 | 0.903 | 1.000 | 0.920 | 1.000 | 0.696 |
|  |  |  |  |  |  |  |
| CIN2+ | Nomogram 21 | 0.901 | 0.813 | 0.888 | 0.965 | 0.591 |
|  | Nomogram 22 | 0.945 | 1.000 | 0.953 | 1.000 | 0.762 |
|  | Nomogram 23 | 0.879 | 1.000 | 0.897 | 1.000 | 0.593 |
|  | Nomogram 24 | 0.857 | 1.000 | 0.879 | 1.000 | 0.552 |
| *Footnote*: CIN: cervical intraepithelial neoplasia. Predicted Probability was calculated using the nomogram in Figure 3 and Figure S2.The cut-off value (Cancer: 83.7%; CIN3+: 69.6%; CIN2+: 68.6%) was determined with the data in Table S3. More in detail in materials and methods. | | | | | | |
